# Supplementary material for: MDR and Pre-XDR Clinical Mycobacterium tuberculosis Beijing Strains: Assessment of Virulence and Host Cytokine Response in Mice Infectious Model
Source: MDPI journal article supplement (doi:10.3390/microorganisms9081792), 2021-08-23
Supplement: s1 [file s1]

**Table S1.** Oligonucleotide primes designed in this study for RT-PCR with SYBR GREEN detection of mice C57BL/6 cytokine genes.

| <b>Gene name</b>               | <b>Forward primer</b>    | <b>Reverse primer</b>    | <b>Size of amplicon, bp</b> |
|--------------------------------|--------------------------|--------------------------|-----------------------------|
| <i>Gapdh</i>                   | GGTGAAGGTCGGTGTGAACGGATT | AAGGGGTCGTTGATGGCAACAAT  | 102                         |
| <i>Actb</i>                    | TGACGATATCGCTGCGCTGG     | CCACGATGGAGGGGAATACA     | 101                         |
| <i>Ifn-<math>\gamma</math></i> | TCTTCAGCAACAGCAAGGCGAAA  | TCCGCTTCCTGAGGCTGGATT    | 147                         |
| <i>Tnf-<math>\alpha</math></i> | CAGAACTCCAGGCGGTGCCTAT   | TGAGTGTGAGGGTCTGGGCCATA  | 169                         |
| <i>Il-1<math>\alpha</math></i> | TGTTGCTGAAGGAGTTGCCAGAAA | CCGACTTTGTTCTTTGGTGGCAAT | 149                         |
| <i>Il-18</i>                   | TCTTTGAAGTTGACGGACCCCAAA | GGACAGCCCAGGTCAAAGGTTT   | 65                          |
| <i>Il-6</i>                    | TTCTCTCTGCAAGAGACTT      | GGAGTGGTATCCTCTGTGAA     | 116                         |
| <i>Il-7</i>                    | ATGTTCCATGTTTCTTTAGATA   | CAAGGATCAGTGGAGGAATT     | 52                          |
| <i>Il-10</i>                   | CACTGCTATGCTGCCTGCTCTTA  | CGACTGGGAAGTGGGTGCAGTTAT | 93                          |
| <i>Il-12(p35)</i>              | CACCTCAGTTTGGCCAGGGTCATT | CAGCAGGTTTCGGGACTGGCTAA  | 72                          |
| <i>Il-12(p40)</i>              | TCTGCTGCTCCACAAGAAGGAAAA | CACGTGAACCGTCCGGAGTAATTT | 114                         |
| <i>Il-13</i>                   | CAGTCCTGGCTCTTGCTT       | GATGTTGCTCAGCTCCTCAA     | 110                         |
| <i>Il-15</i>                   | CTGAGGCTGGCATTTCATGTCTCA | CCAGTTGGCCTCTGTTTTAGGGA  | 72                          |
| <i>Il-17</i>                   | GCTACAGTGAAGGCAGCAGCGAT  | TGGAGCTCACTTTTGCGCCAA    | 130                         |
| <i>Mx1</i>                     | GGAGAAGGTGCGGCCCTGTATT   | TTCCCTGAACTCTGGTCCCCAAT  | 111                         |
| <i>IFI44</i>                   | CTCGTTTGACATGGCAGCAAGAAA | GCCCTCTTTCAGGTACATGCCAAT | 191                         |
| <i>Cxcl2</i>                   | GGCCAGTGAAGTGCCTGTCTAA   | GGCGTCACACTCAAGCTCTGGAT  | 81                          |
| <i>Cxcl5</i>                   | GCGCCGCTGGCATTCTGTT      | TGAGGAAGGGGCAGCTTCAGCTA  | 66                          |
| <i>Cxcl9</i>                   | CGCTGTTCTTTTCTCTTGGGCAT  | TGGGGCAAAGTGTGAGGTCTTT   | 151                         |
| <i>Cxcl10</i>                  | ATGAACCCAAGTGCTGCCGTCAT  | CCCGTCATCGATATGGATGCAGTT | 114                         |
| <i>Ccl2</i>                    | ACCAGCAGCAGGTGTCCCAAA    | TCCTTCTTGGGGTCAGCACAG    | 80                          |
| <i>Ccl3</i>                    | TCTCCACCACTGCCCTTGCTGTT  | TGGAATCTTCCGGCTGTAGGAGAA | 122                         |
| <i>Ccl4</i>                    | CGTGTCTGCCCTCTCTCTCTCTT  | TCAGAGCCCATTTGGTGTGAGAA  | 75                          |
| <i>Ccl5</i>                    | ATCTCTGCAGCTGCCCTCACCAT  | AGGGAGTGGTGTCCGAGCCATA   | 91                          |
| <i>Ccl11</i>                   | TGCAGAGCTCCACAGCGCTTCTAT | TGGGAGGTGAAGGAAGTGACCGT  | 58                          |
| <i>Csf1</i>                    | GCTGGCTTGGCTTGGGATGATT   | TGGCACTGCCTGGGTCTCTAT    | 94                          |
| <i>Csf2</i>                    | TGGAAGCATGTAGAGGCCATCAAA | AGGCGGGTCTGCACACATGTTA   | 131                         |
| <i>Vegf</i>                    | GGTGCACTGGACCCTGGCTTTA   | GCTTCGCTGGTAGACATCCATGAA | 127                         |
