# Supplementary material for: MDR and Pre-XDR Clinical Mycobacterium tuberculosis Beijing Strains: Assessment of Virulence and Host Cytokine Response in Mice Infectious Model
Source: MDPI journal article supplement (doi:10.3390/microorganisms9081792), 2021-08-23
Supplement: s1 [file s1]

**Table S2.** Clinical data of the patients with pulmonary tuberculosis.

| Item                          | Patient A                                                                                                                                                                                                                                           | Patient B                                                                                                                                        |
|-------------------------------|-----------------------------------------------------------------------------------------------------------------------------------------------------------------------------------------------------------------------------------------------------|--------------------------------------------------------------------------------------------------------------------------------------------------|
| Gender                        | Male                                                                                                                                                                                                                                                | Male                                                                                                                                             |
| Age, years                    | 36                                                                                                                                                                                                                                                  | 41                                                                                                                                               |
| Bad habits                    | Smoking 12 years,<br>rarely drinks alcohol                                                                                                                                                                                                          | Rarely drinks alcohol                                                                                                                            |
| Diagnosis                     | Infiltrative pulmonary TB of the left lung upper lobe, being in the phase of decay, a rounded focus of infiltration 38×28 mm with a decay cavity around was revealed in the upper lobe of the left lung                                             | Fibrous-cavernous infiltrative pulmonary TB                                                                                                      |
| Surgery                       | Bronchial blocker introduced to the left superior lobar bronchus                                                                                                                                                                                    | Lobectomy of the left lower lobe; bronchial blocker introduced to the right superior lobar bronchus; later - to the left superior lobar bronchus |
| Antibacterial therapy         | PZA 1.5 g, LVX 0.75 g, KAN 1.0 g, PTO 0.75 g, CS 0.5 g; replace KAN 1.0 g on PAS 10.0 g                                                                                                                                                             | PZA 1.5 g, PAS 9.0 g, LZD 0.6 g, BDQ 0.1 g, CS 0.5 g                                                                                             |
| Positive dynamic of therapy   | Cavity reduction in the upper lobe of the left lung and partial resorption of infiltration foci; a decrease in the decay cavity and partial resorption of foci in the upper lobe of the left lung was noted after introduction of bronchial blocker | Complete and partial resorption of foci in both lungs and a significant decrease in the decay cavity in the left lung                            |
| The outcome                   | The patient was discharged in satisfactory condition to continue treatment at an anti-tuberculosis facility at the place of residence                                                                                                               | The patient was discharged in satisfactory condition to continue treatment at an anti-tuberculosis facility at the place of residence            |
| <i>M. tuberculosis</i> strain | 120/26                                                                                                                                                                                                                                              | 267/47                                                                                                                                           |
| Isolation date                | 18.04.2018                                                                                                                                                                                                                                          | 17.05.2018                                                                                                                                       |
| Resistance phenotype          | MDR                                                                                                                                                                                                                                                 | XDR                                                                                                                                              |
| Antibacterial resistance      | INH, RIF, STR, EMB                                                                                                                                                                                                                                  | INH, RIF, STR, EMB, AMK, KAN, CAP, OFX, PZA                                                                                                      |

Note: TB, tuberculosis; PZA, pyrazinamide; LVX, levofloxacin; KAN, kanamycin; PTO, prothionamide; CS, cycloserine; LZD, linezolid; BDQ, bedaquiline; STR, streptomycin; INH, isoniazid; RIF, rifampin; EMB, ethambutol; MDR, Multidrug-resistant TB; XDR, extensively drug-resistant TB.
