# Supplementary figures and images for: MDR and Pre-XDR Clinical Mycobacterium tuberculosis Beijing Strains: Assessment of Virulence and Host Cytokine Response in Mice Infectious Model
Source: MDPI journal article supplement (doi:10.3390/microorganisms9081792), 2021-08-23

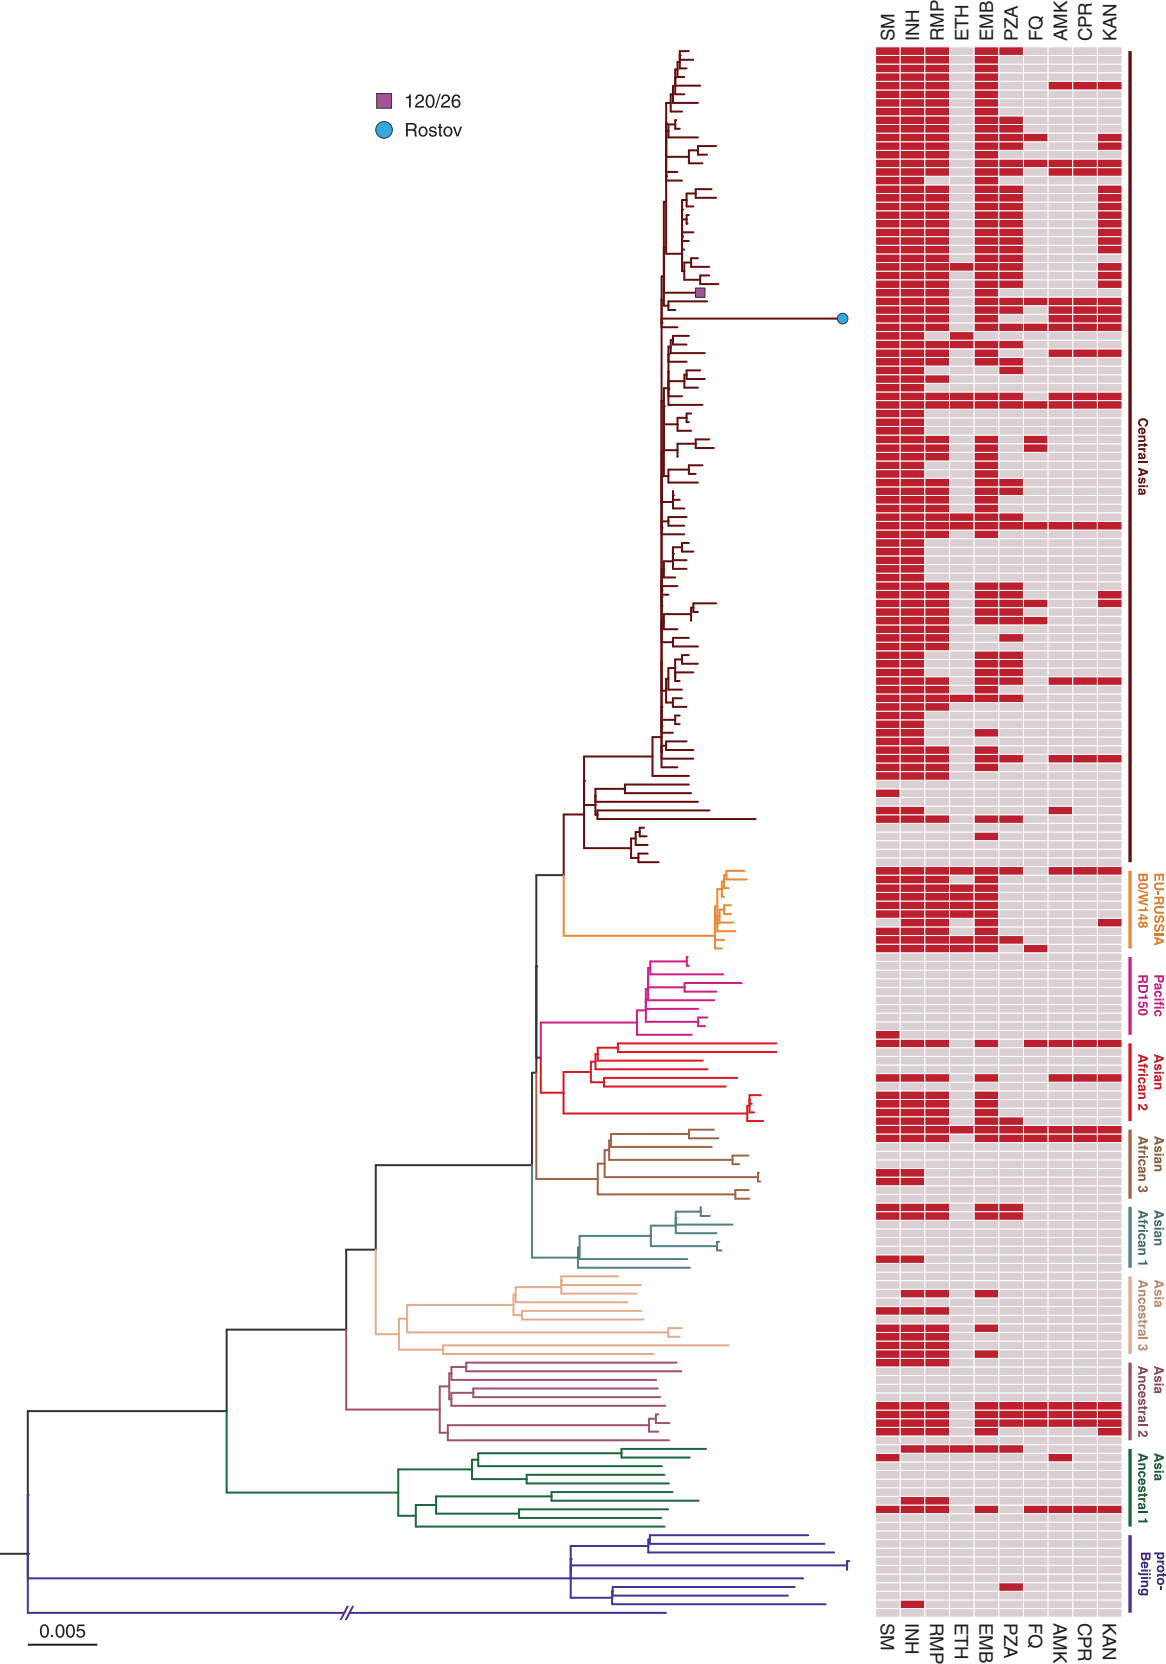

Supplement: s1 [file s1]

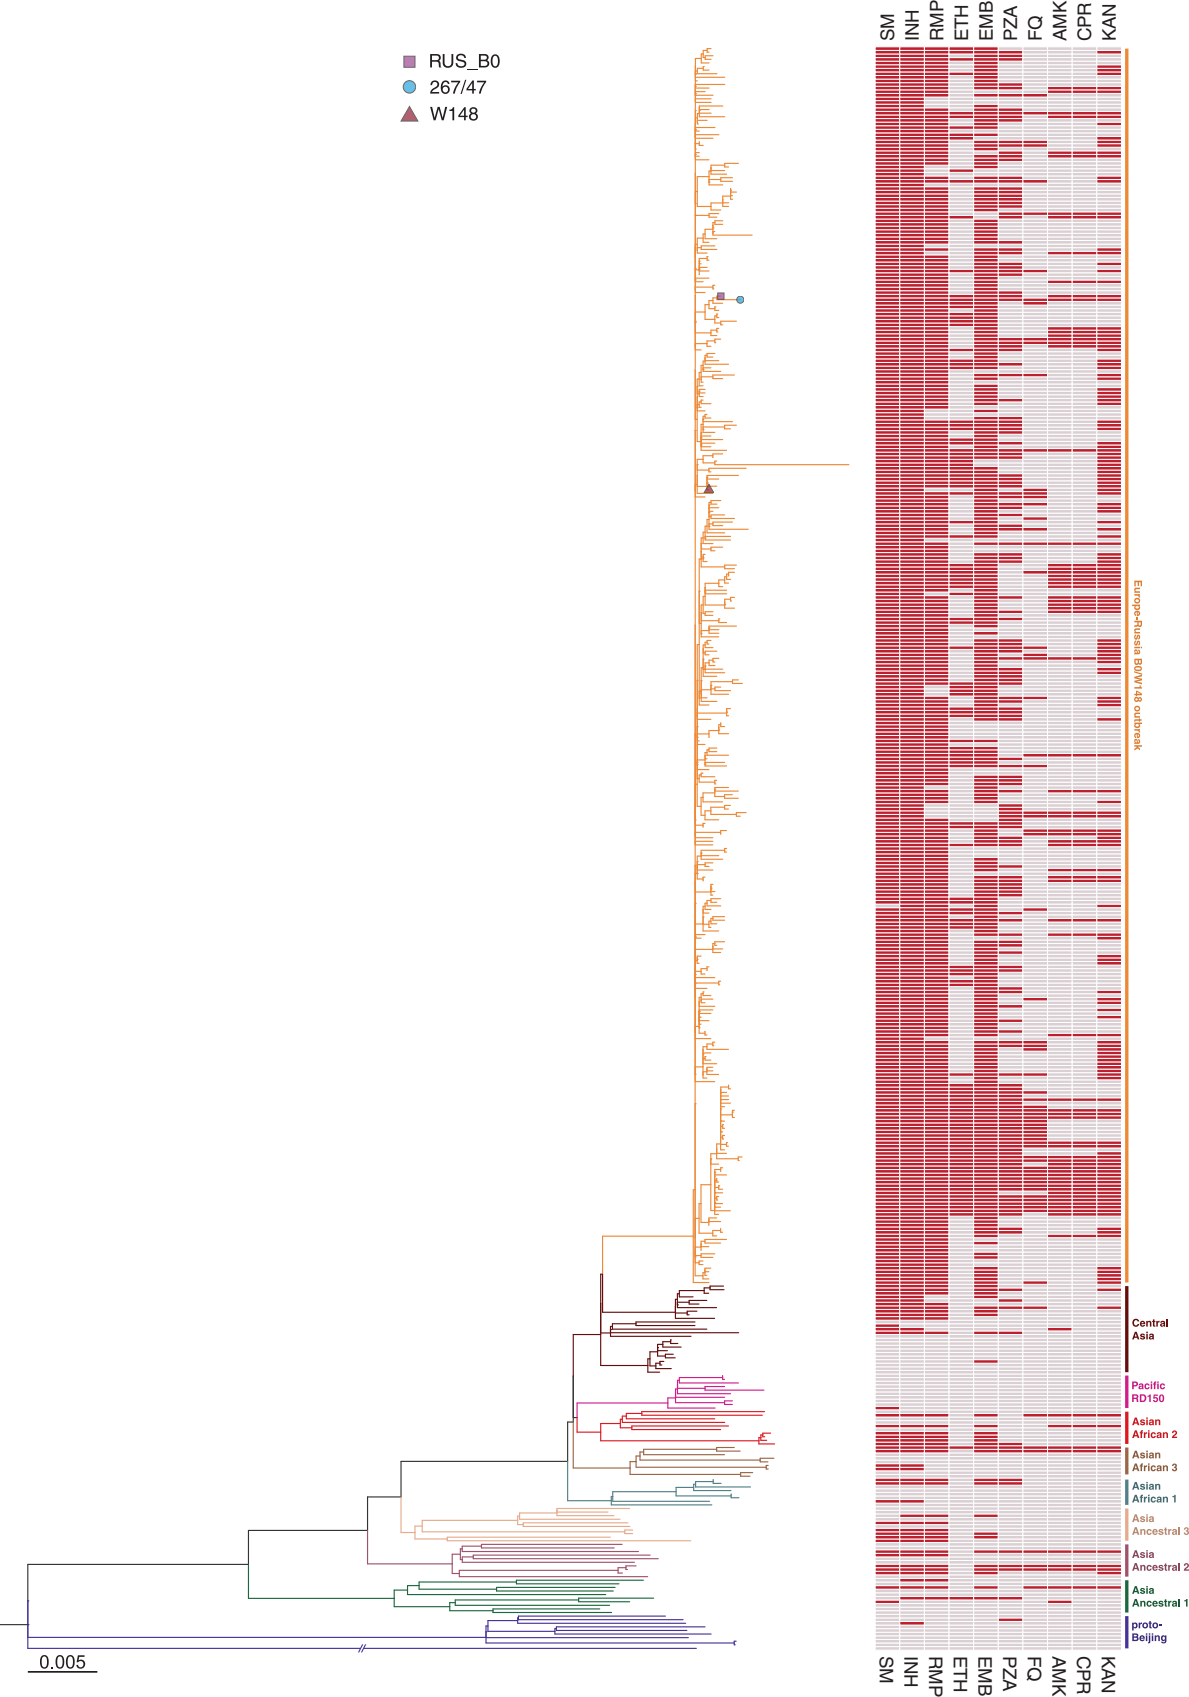

Supplement: s1 [file s1]
